# Supplementary material for: Change Regularity of Taste and the Performance of Endogenous Proteases in Shrimp (Penaens vannamei) Head during Autolysis
Source: MDPI journal article supplement (doi:10.3390/foods10051020), 2021-05-08
Supplement: s1 [file s1]

**Table S1.** The information of chemical sensors in E-tongue

| Chemical Sensor | Determination of taste |
|-----------------|------------------------|
| CA0             | sourness               |
| AE1             | astringency            |
| AAE             | umami sensor           |
| CT0             | saltiness              |
| C00             | bitterness             |
