# Supplementary material for: Change Regularity of Taste and the Performance of Endogenous Proteases in Shrimp (Penaens vannamei) Head during Autolysis
Source: MDPI journal article supplement (doi:10.3390/foods10051020), 2021-05-08
Supplement: s1 [file s1]

**Table S2.** The information of chemical sensors in E-nose

| Chemical Sensor | Determination of volatile substances                |
|-----------------|-----------------------------------------------------|
| W1C             | Aromatic ingredients                                |
| W5S             | High sensitivity and sensitive to nitrogen oxides   |
| W3C             | Ammonia, sensitive to aromatic ingredients          |
| W6S             | Mainly selective for hydrogen                       |
| W5C             | Alkane aromatic component                           |
| W1S             | Sensitive to methane                                |
| W1W             | Sensitive to sulfides                               |
| W2S             | Sensitive to ethanol                                |
| W2W             | Aromatic ingredients, sensitive to organic sulfides |
| W3S             | Sensitive to alkanes                                |
